# Supplementary material for: Exaiptasia diaphana from the Great Barrier Reef: a valuable resource for coral symbiosis research
Source: bioRxiv or medRxiv preprint supplement (doi:10.1101/775510), 2019-09-20
Supplement: Supplementary file [file media-1.pdf]

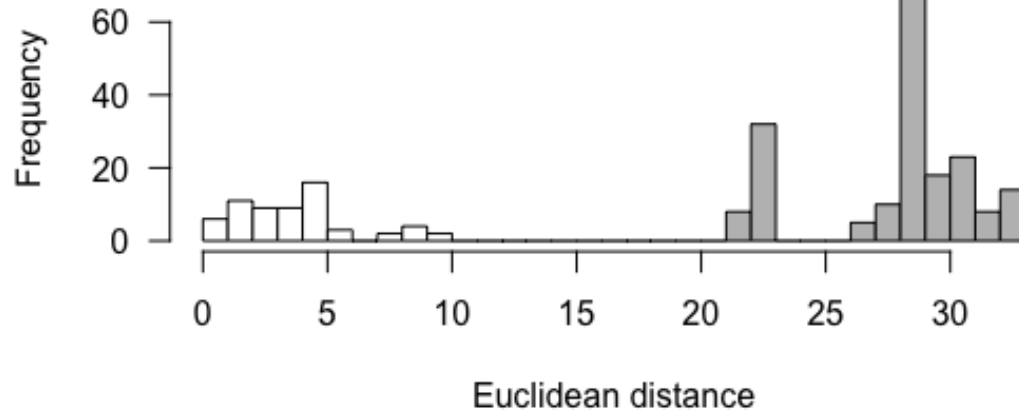

**Online Resource 4:** Histogram of Euclidean distances among *Exaiptasia diaphana* individuals. The inferred clonal (range of 0-9.61) and inter-genotypic distributions are shown in white and grey, respectively.
