# Supplementary material for: Exaiptasia diaphana from the Great Barrier Reef: a valuable resource for coral symbiosis research
Source: bioRxiv or medRxiv preprint supplement (doi:10.1101/775510), 2019-09-20
Supplement: Supplementary file [file media-2.pdf]

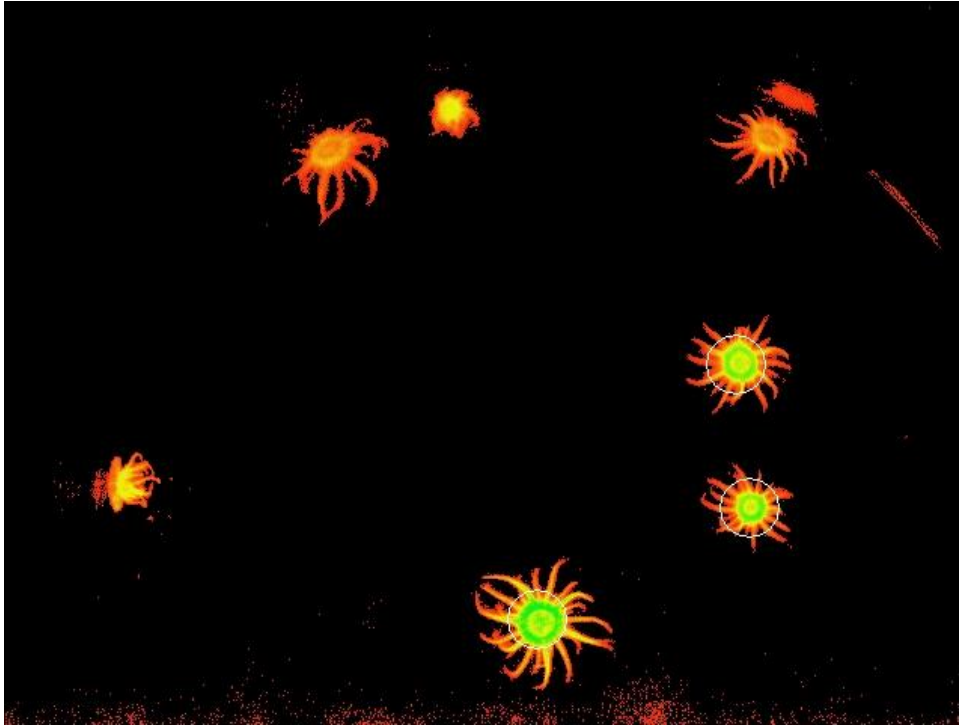

**Online Resource 3:** Areas of interest (AOIs) are show as white circles surrounding the central body of the anemones and including the proximal portion of the tentacles. A minimum of three anemones per jar were selected, avoiding individuals on the sides that were out of focus and could skew the data.  $F_0$  values ranged from 0.100 to 0.300. No scale available.
