# Supplementary material for: Exaiptasia diaphana from the Great Barrier Reef: a valuable resource for coral symbiosis research
Source: bioRxiv or medRxiv preprint supplement (doi:10.1101/775510), 2019-09-20
Supplement: Supplementary file [file media-3.pdf]

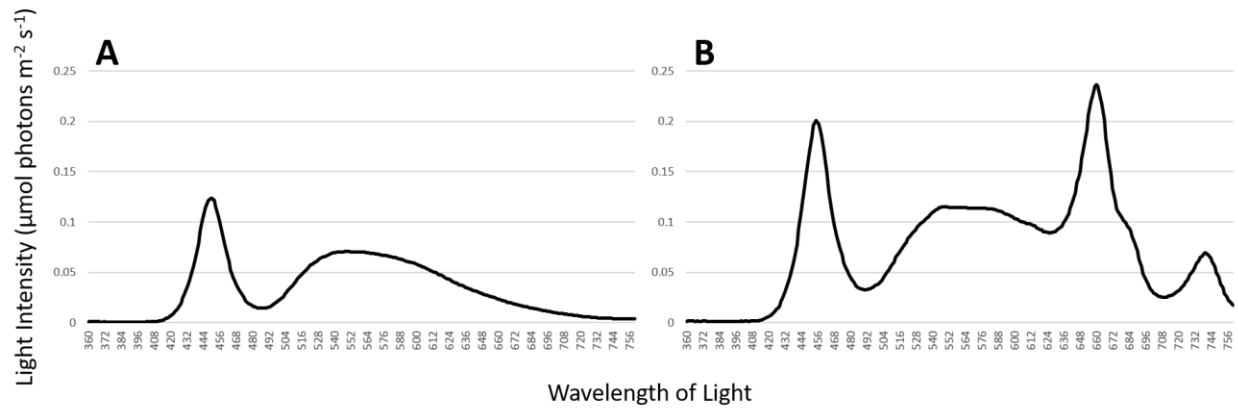

**Online Resource 2:** Spectra of light intensities (HiPoint HR-350 LED meter) from the A) walk-in incubator where the GBR-sourced stock anemones are held (fitted with white LEDs only) and B) the experimental growth chambers (Taiwan HiPoint Corporation model 740FHC) fitted with red, white, and infrared LED lights.
