# Supplementary material for: Exaiptasia diaphana from the Great Barrier Reef: a valuable resource for coral symbiosis research
Source: bioRxiv or medRxiv preprint supplement (doi:10.1101/775510), 2019-09-20
Supplement: Supplementary file [file media-4.pdf]

- 1 **Online Resource 8:** Pairwise comparisons between genotypes by sampling day from a linear mixed effects model with genotype and  
 2 sampling day as fixed effects and anemone jar as a random effect. **Significant differences are noted in bold.**

| Sampling Day | Genotype | Mean  | SE      | lower.CL | upper.CL | contrast | estimate | SE      | df | t.ratio | p.value          |
|--------------|----------|-------|---------|----------|----------|----------|----------|---------|----|---------|------------------|
| 0            | 2        | 0.541 | 0.01202 | 0.517    | 0.565    | 2-3      | 0.067667 | 0.01701 | 60 | 3.979   | <b>0.0005</b>    |
| 0            | 3        | 0.473 | 0.01202 | 0.449    | 0.497    | 2-4      | 0.003333 | 0.01701 | 60 | 0.196   | 0.979            |
| 0            | 4        | 0.537 | 0.01202 | 0.513    | 0.561    | 3-4      | -0.06433 | 0.01701 | 60 | -3.783  | <b>0.001</b>     |
| 5            | 2        | 0.441 | 0.00721 | 0.427    | 0.456    | 2-3      | 0.006964 | 0.00992 | 60 | 0.702   | 0.7634           |
| 5            | 3        | 0.434 | 0.00682 | 0.421    | 0.448    | 2-4      | -0.00335 | 0.00992 | 60 | -0.338  | 0.9391           |
| 5            | 4        | 0.445 | 0.00682 | 0.431    | 0.458    | 3-4      | -0.01032 | 0.00964 | 60 | -1.07   | 0.5361           |
| 11           | 2        | 0.412 | 0.00491 | 0.402    | 0.422    | 2-3      | 0.016889 | 0.00694 | 60 | 2.433   | <b>0.0466</b>    |
| 11           | 3        | 0.395 | 0.00491 | 0.385    | 0.405    | 2-4      | 0.003278 | 0.00694 | 60 | 0.472   | 0.8846           |
| 11           | 4        | 0.409 | 0.00491 | 0.399    | 0.419    | 3-4      | -0.01361 | 0.00694 | 60 | -1.961  | 0.131            |
| 18           | 2        | 0.408 | 0.00491 | 0.398    | 0.418    | 2-3      | 0.0477   | 0.00694 | 60 | 6.871   | <b>&lt;.0001</b> |
| 18           | 3        | 0.36  | 0.00491 | 0.351    | 0.37     | 2-4      | 0.020478 | 0.00694 | 60 | 2.95    | <b>0.0124</b>    |
| 18           | 4        | 0.388 | 0.00491 | 0.378    | 0.398    | 3-4      | -0.02722 | 0.00694 | 60 | -3.921  | <b>0.0007</b>    |
| 21           | 2        | 0.421 | 0.00831 | 0.404    | 0.437    | 2-3      | 0.068978 | 0.01175 | 60 | 5.869   | <b>&lt;.0001</b> |
| 21           | 3        | 0.352 | 0.00831 | 0.335    | 0.368    | 2-4      | 0.034306 | 0.01175 | 60 | 2.919   | <b>0.0135</b>    |
| 21           | 4        | 0.386 | 0.00831 | 0.37     | 0.403    | 3-4      | -0.03467 | 0.01175 | 60 | -2.95   | <b>0.0124</b>    |
| 23           | 2        | 0.463 | 0.00831 | 0.447    | 0.48     | 2-3      | 0.063478 | 0.01175 | 60 | 5.401   | <b>&lt;.0001</b> |
| 23           | 3        | 0.4   | 0.00831 | 0.383    | 0.417    | 2-4      | 0.044639 | 0.01175 | 60 | 3.798   | <b>0.001</b>     |
| 23           | 4        | 0.419 | 0.00831 | 0.402    | 0.435    | 3-4      | -0.01884 | 0.01175 | 60 | -1.603  | 0.2523           |
| 27           | 2        | 0.461 | 0.00831 | 0.445    | 0.478    | 2-3      | 0.071811 | 0.01175 | 60 | 6.11    | <b>&lt;.0001</b> |
| 27           | 3        | 0.39  | 0.00831 | 0.373    | 0.406    | 2-4      | 0.025473 | 0.01175 | 60 | 2.167   | 0.0852           |
| 27           | 4        | 0.436 | 0.00831 | 0.419    | 0.453    | 3-4      | -0.04634 | 0.01175 | 60 | -3.943  | <b>0.0006</b>    |
| 32           | 2        | 0.508 | 0.01155 | 0.485    | 0.531    | 2-3      | 0.021037 | 0.01634 | 60 | 1.288   | 0.4075           |
| 32           | 3        | 0.487 | 0.01155 | 0.463    | 0.51     | 2-4      | 0.06324  | 0.01634 | 60 | 3.871   | <b>0.0008</b>    |
| 32           | 4        | 0.444 | 0.01155 | 0.421    | 0.467    | 3-4      | 0.042203 | 0.01633 | 60 | 2.584   | <b>0.0323</b>    |
| 36           | 2        | 0.523 | 0.01398 | 0.495    | 0.551    | 2-3      | 0.014644 | 0.01813 | 60 | 0.808   | 0.6998           |
| 36           | 3        | 0.509 | 0.01155 | 0.485    | 0.532    | 2-4      | 0.035513 | 0.01813 | 60 | 1.959   | 0.1314           |
| 36           | 4        | 0.488 | 0.01155 | 0.465    | 0.511    | 3-4      | 0.02087  | 0.01633 | 60 | 1.278   | 0.4132           |

|    |   |       |         |       |       |     |          |         |    |        |               |
|----|---|-------|---------|-------|-------|-----|----------|---------|----|--------|---------------|
| 40 | 2 | 0.502 | 0.01155 | 0.479 | 0.525 | 2-3 | 0.051704 | 0.01634 | 60 | 3.165  | <b>0.0068</b> |
| 40 | 3 | 0.45  | 0.01155 | 0.427 | 0.473 | 2-4 | 0.035907 | 0.01634 | 60 | 2.198  | 0.0797        |
| 40 | 4 | 0.466 | 0.01155 | 0.443 | 0.489 | 3-4 | -0.0158  | 0.01633 | 60 | -0.967 | 0.6003        |
| 44 | 2 | 0.467 | 0.01155 | 0.444 | 0.49  | 2-3 | 0.025704 | 0.01634 | 60 | 1.574  | 0.2649        |
| 44 | 3 | 0.441 | 0.01155 | 0.418 | 0.464 | 2-4 | 0.01124  | 0.01634 | 60 | 0.688  | 0.7713        |
| 44 | 4 | 0.455 | 0.01155 | 0.432 | 0.478 | 3-4 | -0.01446 | 0.01633 | 60 | -0.886 | 0.6515        |
| 48 | 2 | 0.467 | 0.01155 | 0.444 | 0.49  | 2-3 | -0.0093  | 0.01634 | 60 | -0.569 | 0.837         |
| 48 | 3 | 0.476 | 0.01155 | 0.453 | 0.499 | 2-4 | -0.03009 | 0.01634 | 60 | -1.842 | 0.1648        |
| 48 | 4 | 0.497 | 0.01155 | 0.474 | 0.52  | 3-4 | -0.0208  | 0.01633 | 60 | -1.273 | 0.4157        |
| 51 | 2 | 0.522 | 0.01155 | 0.499 | 0.545 | 2-3 | 0.009371 | 0.01634 | 60 | 0.574  | 0.8346        |
| 51 | 3 | 0.513 | 0.01155 | 0.489 | 0.536 | 2-4 | 0.008907 | 0.01634 | 60 | 0.545  | 0.8493        |
| 51 | 4 | 0.513 | 0.01155 | 0.49  | 0.536 | 3-4 | -0.00046 | 0.01633 | 60 | -0.028 | 0.9996        |
| 54 | 2 | 0.508 | 0.01155 | 0.485 | 0.531 | 2-3 | 0.034371 | 0.01634 | 60 | 2.104  | 0.0975        |
| 54 | 3 | 0.473 | 0.01155 | 0.45  | 0.496 | 2-4 | -0.00443 | 0.01634 | 60 | -0.271 | 0.9604        |
| 54 | 4 | 0.512 | 0.01155 | 0.489 | 0.535 | 3-4 | -0.0388  | 0.01633 | 60 | -2.375 | 0.0534        |
| 57 | 2 | 0.484 | 0.01155 | 0.461 | 0.507 | 2-3 | 0.022704 | 0.01634 | 60 | 1.39   | 0.3526        |
| 57 | 3 | 0.461 | 0.01155 | 0.438 | 0.484 | 2-4 | -0.01509 | 0.01634 | 60 | -0.924 | 0.6274        |
| 57 | 4 | 0.499 | 0.01155 | 0.476 | 0.522 | 3-4 | -0.0378  | 0.01633 | 60 | -2.314 | 0.0615        |
| 60 | 2 | 0.467 | 0.01155 | 0.444 | 0.49  | 2-3 | -0.02596 | 0.01634 | 60 | -1.589 | 0.2581        |
| 60 | 3 | 0.493 | 0.01155 | 0.47  | 0.516 | 2-4 | -0.02476 | 0.01634 | 60 | -1.516 | 0.2909        |
| 60 | 4 | 0.492 | 0.01155 | 0.469 | 0.515 | 3-4 | 0.001203 | 0.01633 | 60 | 0.074  | 0.997         |
| 63 | 2 | 0.461 | 0.01155 | 0.438 | 0.484 | 2-3 | -0.01796 | 0.01634 | 60 | -1.1   | 0.5181        |
| 63 | 3 | 0.479 | 0.01155 | 0.456 | 0.502 | 2-4 | -0.01609 | 0.01634 | 60 | -0.985 | 0.589         |
| 63 | 4 | 0.477 | 0.01155 | 0.454 | 0.5   | 3-4 | 0.00187  | 0.01633 | 60 | 0.114  | 0.9928        |
