# Supplementary material for: Exaiptasia diaphana from the Great Barrier Reef: a valuable resource for coral symbiosis research
Source: bioRxiv or medRxiv preprint supplement (doi:10.1101/775510), 2019-09-20
Supplement: Supplementary file [file media-5.pdf]

- 1 **Online Resource 7:** Statistical output from linear mixed effect output where genotype and  
2 sampling day were chosen as fixed effects and anemone jar was identified as a random effect.

|                       | numDF | denDF | F-value  | p-value |
|-----------------------|-------|-------|----------|---------|
| (Intercept)           | 1     | 175   | 59220.65 | <.0001  |
| Genotype              | 2     | 60    | 31.76    | <.0001  |
| Sampling_Day          | 16    | 175   | 70.76    | <.0001  |
| Genotype:Sampling_Day | 32    | 175   | 3.96     | <.0001  |

3
