# Supplementary material for: Exaiptasia diaphana from the Great Barrier Reef: a valuable resource for coral symbiosis research
Source: bioRxiv or medRxiv preprint supplement (doi:10.1101/775510), 2019-09-20
Supplement: Supplementary file [file media-6.pdf]

1 **Online Resource 6:** TukeyHSD pairwise comparisons for Symbiodiniaceae cell densities  
 2 normalized to host protein between genotypes from a one-way ANOVA ( $F_{(3,200)}=3.985$ ,  
 3  $p=0.00872$ ). **Significant differences are noted in bold.**

4

| <i>Genotype</i> | <i>diff</i>    | <i>lwr</i>      | <i>upr</i>     | <i>p</i>       |
|-----------------|----------------|-----------------|----------------|----------------|
| 2-1             | -2196232       | -4966379        | 573915.5       | 0.172015       |
| 3-1             | -902961        | -3673108        | 1867186        | 0.83311        |
| 4-1             | -1109622       | -3879769        | 1660525        | 0.727473       |
| 3-2             | <b>1293271</b> | <b>162362.8</b> | <b>2424179</b> | <b>0.01784</b> |
| 4-2             | 1086609        | -44298.5        | 2217517        | 0.064653       |
| 4-3             | -206661        | -1337569        | 924246.6       | 0.964843       |

5
