# Supplementary material for: Exaiptasia diaphana from the Great Barrier Reef: a valuable resource for coral symbiosis research
Source: bioRxiv or medRxiv preprint supplement (doi:10.1101/775510), 2019-09-20
Supplement: Supplementary file [file media-7.pdf]

1 **Online Resource 1:** Histological processing steps used to serially dehydrate anemone tissue  
 2 after fixation but prior to embedding. This protocol is modified from Carlisle et al. (2017).

3

| Process     | Solution                    | Duration  |
|-------------|-----------------------------|-----------|
| Rinsing     | Deionized water             | 15 min    |
|             | Running tap water           | 4 hr      |
| Dehydration | 50% ethanol                 | 50 min    |
|             | 70% ethanol                 | Overnight |
|             | 90% ethanol                 | 50 min    |
|             | 100% ethanol I              | 50 min    |
|             | 100% ethanol II             | 50 min    |
|             | 100% ethanol III            | 50 min    |
| Clearing    | 1:1 100% ethanol:Xylene     | 50 min    |
|             | Xylene I                    | 50 min    |
|             | Xylene II                   | 50 min    |
| Embedding   | Histoplast paraffin wax I   | 1 hr      |
|             | Histoplast paraffin wax II  | 1 hr      |
|             | Histoplast paraffin wax III | 1 hr      |
|             | Histoplast paraffin wax IV  | 1 hr      |

4

5 Carlisle JF, Murphy GK, Roark AM (2017) Body size and symbiotic status influence gonad development in  
 6 *Aiptasia pallida* anemones *Symbiosis* 71:121-127 doi:10.1007/s13199-016-0456-1

7
