# Supplementary material for: Exaiptasia diaphana from the Great Barrier Reef: a valuable resource for coral symbiosis research
Source: bioRxiv or medRxiv preprint supplement (doi:10.1101/775510), 2019-09-20
Supplement: Supplementary file [file media-8.pdf]

**Online Resource 5:** Euclidean distance matrix between *E. diaphana* individuals. Individuals are arranged by genotype (AIMS1-4) and distances within and outside the clonal distribution are shown in white and grey, respectively. Name codes: Ed = *Exaiptasia diaphana* sent from AIMS, S= *Exaiptasia diaphana* originally from AIMS but held at Swinburne University of Technology (with I, II, A, B, and C as individuals)

| Genotype   | <u>AIMS1</u> |       |       |       |       |       |       |       | <u>AIMS3</u> |        |        |       |       |       |       | <u>AIMS2</u> |       |       |       |       | <u>AIMS4</u> |       |       |
|------------|--------------|-------|-------|-------|-------|-------|-------|-------|--------------|--------|--------|-------|-------|-------|-------|--------------|-------|-------|-------|-------|--------------|-------|-------|
| Individual | Ed.01        | Ed.02 | Ed.03 | Ed.07 | Ed.08 | Ed.09 | Ed.12 | Ed.21 | Ed.06        | Ed.11a | Ed.11b | Ed.14 | Ed.17 | Ed.18 | Ed.19 | Ed.10        | Ed.20 | Ed.22 | SC    | SII   | SA           | SB    | SI    |
| Ed.01      | 0.00         | 3.76  | 1.67  | 4.22  | 0.50  | 0.71  | 2.90  | 2.12  | 28.28        | 28.29  | 29.48  | 28.31 | 28.87 | 28.29 | 28.32 | 22.11        | 22.12 | 21.96 | 21.92 | 22.16 | 30.66        | 30.80 | 28.97 |
| Ed.02      | 3.76         | 0.00  | 3.69  | 5.45  | 3.72  | 3.72  | 4.18  | 4.42  | 28.64        | 28.65  | 29.57  | 28.67 | 29.21 | 28.66 | 28.69 | 22.22        | 22.42 | 22.12 | 22.05 | 22.33 | 30.37        | 30.56 | 28.56 |
| Ed.03      | 1.67         | 3.69  | 0.00  | 4.37  | 1.59  | 1.81  | 2.90  | 2.63  | 28.32        | 28.33  | 29.46  | 28.35 | 28.90 | 28.34 | 28.38 | 22.11        | 22.15 | 21.99 | 21.94 | 22.18 | 30.67        | 30.82 | 29.01 |
| Ed.07      | 4.22         | 5.45  | 4.37  | 0.00  | 4.18  | 4.18  | 5.41  | 4.74  | 28.63        | 28.64  | 29.65  | 28.66 | 29.12 | 28.63 | 28.69 | 22.30        | 22.43 | 22.25 | 22.14 | 22.37 | 30.54        | 30.75 | 28.86 |
| Ed.08      | 0.50         | 3.72  | 1.59  | 4.18  | 0.00  | 0.50  | 2.84  | 2.05  | 28.28        | 28.29  | 29.47  | 28.30 | 28.87 | 28.28 | 28.32 | 22.10        | 22.12 | 21.96 | 21.91 | 22.16 | 30.65        | 30.80 | 28.97 |
| Ed.09      | 0.71         | 3.72  | 1.81  | 4.18  | 0.50  | 0.00  | 2.79  | 1.99  | 28.27        | 28.28  | 29.47  | 28.30 | 28.86 | 28.28 | 28.31 | 22.12        | 22.14 | 21.98 | 21.93 | 22.17 | 30.67        | 30.81 | 28.97 |
| Ed.12      | 2.90         | 4.18  | 2.90  | 5.41  | 2.84  | 2.79  | 0.00  | 3.44  | 28.67        | 28.68  | 29.87  | 28.70 | 28.96 | 28.67 | 28.72 | 22.25        | 22.27 | 22.15 | 22.11 | 22.44 | 30.90        | 31.07 | 29.09 |
| Ed.21      | 2.12         | 4.42  | 2.63  | 4.74  | 2.05  | 1.99  | 3.44  | 0.00  | 28.32        | 28.32  | 29.60  | 28.35 | 28.87 | 28.31 | 28.35 | 22.32        | 22.34 | 22.18 | 22.13 | 22.36 | 30.51        | 30.66 | 28.74 |
| Ed.06      | 28.28        | 28.64 | 28.32 | 28.63 | 28.28 | 28.27 | 28.67 | 28.32 | 0.00         | 1.73   | 8.67   | 1.00  | 4.43  | 1.50  | 1.67  | 28.16        | 28.23 | 27.95 | 27.91 | 28.15 | 32.61        | 32.61 | 31.51 |
| Ed.11a     | 28.29        | 28.65 | 28.33 | 28.64 | 28.29 | 28.28 | 28.68 | 28.32 | 1.73         | 0.00   | 8.82   | 0.00  | 4.43  | 0.50  | 1.33  | 28.20        | 28.26 | 27.99 | 27.96 | 28.21 | 32.61        | 32.60 | 31.50 |
| Ed.11b     | 29.48        | 29.57 | 29.46 | 29.65 | 29.47 | 29.47 | 29.87 | 29.60 | 8.67         | 8.82   | 0.00   | 8.68  | 9.61  | 8.66  | 9.07  | 29.47        | 29.89 | 29.19 | 29.10 | 29.43 | 32.73        | 32.84 | 31.43 |
| Ed.14      | 28.31        | 28.67 | 28.35 | 28.66 | 28.30 | 28.30 | 28.70 | 28.35 | 1.00         | 0.00   | 8.68   | 0.00  | 4.43  | 1.00  | 1.67  | 28.20        | 28.27 | 27.99 | 27.96 | 28.21 | 32.63        | 32.63 | 31.53 |
| Ed.17      | 28.87        | 29.21 | 28.90 | 29.12 | 28.87 | 28.86 | 28.96 | 28.87 | 4.43         | 4.43   | 9.61   | 4.43  | 0.00  | 4.59  | 4.86  | 28.72        | 28.87 | 28.46 | 28.47 | 28.72 | 32.71        | 32.73 | 31.40 |
| Ed.18      | 28.29        | 28.66 | 28.34 | 28.63 | 28.28 | 28.28 | 28.67 | 28.31 | 1.50         | 0.50   | 8.66   | 1.00  | 4.59  | 0.00  | 1.24  | 28.17        | 28.23 | 27.97 | 27.93 | 28.18 | 32.63        | 32.61 | 31.50 |
| Ed.19      | 28.32        | 28.69 | 28.38 | 28.69 | 28.32 | 28.31 | 28.72 | 28.35 | 1.67         | 1.33   | 9.07   | 1.67  | 4.86  | 1.24  | 0.00  | 28.12        | 28.13 | 27.97 | 27.93 | 28.17 | 32.70        | 32.63 | 31.58 |
| Ed.10      | 22.11        | 22.22 | 22.11 | 22.30 | 22.10 | 22.12 | 22.25 | 22.32 | 28.16        | 28.20  | 29.47  | 28.20 | 28.72 | 28.17 | 28.12 | 0.00         | 4.15  | 3.66  | 3.14  | 4.43  | 30.51        | 30.69 | 26.88 |
| Ed.20      | 22.12        | 22.42 | 22.15 | 22.43 | 22.12 | 22.14 | 22.27 | 22.34 | 28.23        | 28.26  | 29.89  | 28.27 | 28.87 | 28.23 | 28.13 | 4.15         | 0.00  | 4.37  | 4.04  | 5.03  | 30.40        | 30.56 | 26.84 |
| Ed.22      | 21.96        | 22.12 | 21.99 | 22.25 | 21.96 | 21.98 | 22.15 | 22.18 | 27.95        | 27.99  | 29.19  | 27.99 | 28.46 | 27.97 | 27.97 | 3.66         | 4.37  | 0.00  | 2.09  | 3.88  | 30.22        | 30.45 | 26.68 |
| SC         | 21.92        | 22.05 | 21.94 | 22.14 | 21.91 | 21.93 | 22.11 | 22.13 | 27.91        | 27.96  | 29.10  | 27.96 | 28.47 | 27.93 | 27.93 | 3.14         | 4.04  | 2.09  | 0.00  | 3.47  | 30.22        | 30.43 | 26.67 |
| SII        | 22.16        | 22.33 | 22.18 | 22.37 | 22.16 | 22.17 | 22.44 | 22.36 | 28.15        | 28.21  | 29.43  | 28.21 | 28.72 | 28.18 | 28.17 | 4.43         | 5.03  | 3.88  | 3.47  | 0.00  | 29.69        | 29.88 | 26.27 |
